# Supplementary material
Source: PubMed Central journal article supplement (PMC4658667)

**Table S1. Direct hydrogen bonds and ion pairs between CdiA-CT/Cdil toxin/immunity proteins.**

|                            | <b>CdiA-CT toxin</b> | <b>Cdil immunity</b> | <b>Distance (Å)</b> |
|----------------------------|----------------------|----------------------|---------------------|
| <b>EC869<sub>o11</sub></b> |                      |                      |                     |
| Main-Side                  | Lys242 NZ            | Ile137 O             | 2.73                |
|                            | Arg249 NH2           | Phe75 O              | 2.72                |
|                            | Glu250 O             | Thr31 OG1            | 3.65                |
| Side-Side                  | Asp187 OD2           | Arg71 NE             | 2.82                |
|                            | Lys242 NZ            | Asn138 OD1           | 3.90                |
|                            | Tyr244 OH            | Lys128 NZ            | 3.99                |
|                            | Glu243 OE1           | Arg122 NE            | 3.15                |
|                            | Glu243 OE2           | Arg122 NE            | 3.70                |
|                            | Glu243 OE2           | Lys109 NZ            | 3.33                |
|                            | Glu243 OE2           | Arg122 NH2           | 3.10                |
|                            | Ser247 OG            | Glu130 OE1           | 3.36                |
|                            | Glu250 OE1           | Arg122 NH2           | 3.18                |
|                            | Glu250 OE2           | Arg122 NH2           | 3.39                |
|                            | Glu250 OE2           | Thr31 OG1            | 3.82                |
|                            | Glu250 OE2           | Asn12 ND2            | 3.08                |
|                            | Glu250 OE1           | Lys109 NZ            | 3.12                |
| <b>YPIII</b>               |                      |                      |                     |
| Main-Side                  | Thr250 O             | Asn30 ND2            | 3.89                |
|                            | Lys243 NZ            | Pro133 O             | 2.85                |
|                            | Glu242 OE2           | Leu147 N             | 3.72                |
|                            | Ala203 O             | Arg28 NE             | 2.92                |
|                            | Thr204 O             | Arg28 NE             | 3.43                |
|                            | Thr204 O             | Arg28 NH2            | 3.43                |
|                            | Met255 O             | Arg28 NH1            | 2.79                |
| Side-Side                  | Lys243 NZ            | Ser132 OG            | 2.55                |
|                            | Lys195 NZ            | Glu137 OE1           | 2.68                |
|                            | Lys195 NZ            | Glu137 OE2           | 3.01                |
|                            | Arg202 NH1           | Ser29 OG             | 2.99                |
|                            | Lys243 NZ            | Asp121 OD2           | 3.05                |
|                            | Asp201 OD1           | Arg69 NH1            | 2.71                |
|                            | Asp201 OD2           | Arg69 NH2            | 3.09                |

**Table S2. Bacterial strains and plasmids**

| <b>Strain or plasmid</b>       | <b>Description<sup>a</sup></b>                                                                                                                                                                                                                                                    | <b>Reference or source</b> |
|--------------------------------|-----------------------------------------------------------------------------------------------------------------------------------------------------------------------------------------------------------------------------------------------------------------------------------|----------------------------|
| <b>Strains</b>                 |                                                                                                                                                                                                                                                                                   |                            |
| BL21-Gold(DE3)                 | <i>E. coli</i> B F <sup>-</sup> <i>ompT hsdS</i> (r <sub>B</sub> <sup>-</sup> m <sub>B</sub> <sup>-</sup> ) <i>dcm</i> <sup>+</sup> <i>gal</i> λ(DE3) <i>endA</i> , Tet <sup>R</sup>                                                                                              | Agilent                    |
| EPI100                         | F <sup>-</sup> <i>mcrA</i> Δ( <i>mrr-hsdRMS-mcrBC</i> ) φ80 <i>dlacZ</i> ΔM15 Δ <i>lacXcZ</i> ΔM15 Δ <i>lacX recA1 endA1 araD139</i> Δ( <i>ara, leu</i> )7697 <i>galU galK</i> λ <sup>-</sup> <i>rpsL nupG</i> , Str <sup>R</sup>                                                 | Epicentre                  |
| EPI100 <i>pir</i> <sup>+</sup> | F <sup>-</sup> <i>mcrA</i> Δ( <i>mrr-hsdRMS-mcrBC</i> ) φ80 <i>dlacZ</i> ΔM15 Δ <i>lacXcZ</i> ΔM15 Δ <i>lacX recA1 endA1 araD139</i> Δ( <i>ara, leu</i> )7697 <i>galU galK</i> λ <sup>-</sup> <i>rpsL nupG pir</i> <sup>+</sup> ( <i>DHFR</i> ), Str <sup>R</sup> Tp <sup>R</sup> | Epicentre                  |
| X90                            | F <sup>'</sup> <i>lacI</i> <sup>q</sup> <i>lac'</i> <i>pro</i> <sup>'</sup> / <i>ara</i> Δ( <i>lac-pro</i> ) <i>nal1 argE</i> ( <i>amb</i> ) <i>rif</i> <i>thi-1</i> , Rif <sup>R</sup>                                                                                           | 1                          |
| DY378                          | W3110 λ <i>cl857</i> Δ( <i>cro-bioA</i> )                                                                                                                                                                                                                                         | 2                          |
| DA28100                        | <i>galK</i> ::sYFP2opt-cat                                                                                                                                                                                                                                                        | Dan Andersson              |
| CH2016                         | X90 (DE3) Δ <i>rna</i> Δ <i>slyD</i> :: <i>kan</i> , Rif <sup>R</sup> Kan <sup>R</sup>                                                                                                                                                                                            | 3                          |
| CH2550                         | EPI1100 <i>galK</i> ::sYFP2opt-kan                                                                                                                                                                                                                                                | This study                 |
| CH2567                         | MC4100 <i>mKate</i> :: <i>cam</i> Str <sup>R</sup> Cm <sup>R</sup>                                                                                                                                                                                                                | This study                 |
| CH8251                         | MC4100 <i>rif</i> <sup>R</sup> , Str <sup>R</sup> Rif <sup>R</sup>                                                                                                                                                                                                                | 4                          |
| <b>Plasmids</b>                |                                                                                                                                                                                                                                                                                   |                            |
| pTrc99a                        | IPTG-inducible expression plasmid, Amp <sup>R</sup>                                                                                                                                                                                                                               | GE Healthcare              |
| pTrc99KX                       | Derivative of pTrc99A that contains KpnI restriction site immediately downstream of the ribosome-binding site, Amp <sup>R</sup>                                                                                                                                                   | 5                          |
| pCH450                         | pACYC184 derivative with <i>E. coli</i> <i>araBAD</i> promoter for arabinose-inducible expression, Tet <sup>R</sup>                                                                                                                                                               | 6                          |
| pSIM6                          | Heat-inducible expression of the phage λ Red recombinase proteins, Amp <sup>R</sup>                                                                                                                                                                                               | 7                          |
| pET21S                         | pET21d derivative with SpeI restriction site for in-frame fusion to His <sub>6</sub> coding sequences, Amp <sup>R</sup>                                                                                                                                                           | 8                          |
| pDE1013                        | pEndy1013- <i>mKate2</i> ::cat                                                                                                                                                                                                                                                    | 9                          |
| pNAK                           | pBluescript derivative with FRT-flanked kanamycin-resistance cassette, Amp <sup>R</sup> Kan <sup>R</sup>                                                                                                                                                                          | This study                 |
| pDAL878                        | Constitutive expression of <i>cdiA</i> <sup>EC93</sup> -Δ <i>CT</i> , in which the toxin-encoding sequence has been deleted, Cm <sup>R</sup>                                                                                                                                      | 8                          |
| pCH10164                       | Constitutive expression of chimeric <i>cdiA</i> <sup>EC93</sup> - <i>CT</i> ( <i>D198A</i> ) <sub>011</sub> <sup>EC869</sup> and <i>cdiI</i> <sub>011</sub> <sup>EC869</sup> . The Asp198Ala mutation inactivates the DNase domain. Cm <sup>R</sup>                               | 4                          |
| pCH848                         | pTrc99KX:: <i>cdiI</i> <sup>YPIII</sup> , Amp <sup>R</sup>                                                                                                                                                                                                                        | This study                 |

|          |                                                                                                                                                                                                                                     |            |
|----------|-------------------------------------------------------------------------------------------------------------------------------------------------------------------------------------------------------------------------------------|------------|
| pCH2409  | Constitutive expression of chimeric <i>cdiA</i> <sup>EC93</sup> - <i>CT</i> <sup>YPIII</sup> and <i>cdil</i> <sup>YPIII</sup> genes, Cm <sup>R</sup>                                                                                | This study |
| pCH2500  | pNAK:: <i>galM</i> <sup>'</sup> , Amp <sup>R</sup> Kan <sup>R</sup>                                                                                                                                                                 | This study |
| pCH2503  | pNAK:: <i>galT</i> <sup>'</sup> - <i>yfp-galM</i> <sup>'</sup> , Amp <sup>R</sup> Kan <sup>R</sup>                                                                                                                                  | This study |
| pCH9305  | Constitutive expression of chimeric <i>cdiA</i> <sup>EC93</sup> - <i>CT</i> <sub>011</sub> <sup>EC869</sup> and <i>cdil</i> <sub>011</sub> <sup>EC869</sup> genes, Cm <sup>R</sup>                                                  | 4          |
| pCH9315  | pTrc99A:: <i>cdil</i> <sub>011</sub> <sup>EC869</sup> , Amp <sup>R</sup>                                                                                                                                                            | 4          |
| pCH9938  | pUC57::NEILACOT_05636 encoding CdiI <sup>Nlact</sup> from <i>Neisseria lactamica</i> ATCC 23970, Amp <sup>R</sup>                                                                                                                   | This study |
| pCH9940  | pUC57::Ykris_10749 encoding CdiI <sup>Ykris</sup> from <i>Yersinia pseudotuberculosis</i> ATCC 33638, Amp <sup>R</sup>                                                                                                              | This study |
| pCH10101 | pCH450::NEILACOT_05636, Tet <sup>R</sup>                                                                                                                                                                                            | This study |
| pCH10103 | pTrc99KX::Ykris_10749, Amp <sup>R</sup>                                                                                                                                                                                             | This study |
| pCH10163 | Cosmid pCdiA-CT/ <i>pheS</i> * that carries a <i>kan-pheS</i> * cassette in place of the <i>E. coli</i> EC93 <i>cdiA-CT/cdil</i> coding sequence. Used for allelic exchange and counter-selection. Cm <sup>R</sup> Kan <sup>R</sup> | 4          |
| pCH10170 | pET21-derivative that expresses CdiI <sup>Ykris</sup> -His <sub>6</sub> from <i>Y. kristensenii</i> ATCC 33638, Amp <sup>R</sup>                                                                                                    | This study |
| pCH10172 | pET21-derivative that expresses CdiI <sup>Nlact</sup> -His <sub>6</sub> <i>N. lactamica</i> ATCC 23970, Amp <sup>R</sup>                                                                                                            | This study |
| pCH10175 | pET21-derivative that expresses CdiA-CT(D198A) <sub>011</sub> <sup>EC869</sup> containing the β4/β5 hairpin from CdiA-CT <sup>Ykris</sup> , Amp <sup>R</sup>                                                                        | This study |
| pCH10365 | pET21-derivative that expresses CdiA-CT(D198A) <sub>011</sub> <sup>EC869</sup> containing the β4/β5 hairpin from CdiA-CT <sup>Nlact</sup> , Amp <sup>R</sup>                                                                        | This study |
| pCH10367 | pET21-derivative that expresses CdiI <sup>YPIII</sup> -His <sub>6</sub> from <i>Y. pseudotuberculosis</i> YPIII, Amp <sup>R</sup>                                                                                                   | This study |
| pCH10369 | pET21-derivative that expresses CdiA-CT <sub>011</sub> <sup>EC869/Δβ4β5</sup> lacking the β4/β5 hairpin, Amp <sup>R</sup>                                                                                                           | This study |
| pCH10407 | pET21-derivative that expresses CdiA-CT/CdiI <sub>011</sub> <sup>EC869</sup> -His <sub>6</sub> complex from <i>E. coli</i> EC869, Amp <sup>R</sup>                                                                                  | 4          |
| pCH10413 | pET21-derivative that expresses CdiA-CT/CdiI <sup>YPIII</sup> -His <sub>6</sub> complex from <i>Y. pseudotuberculosis</i> YPIII, Amp <sup>R</sup>                                                                                   | This study |

<sup>a</sup>Abbreviations: Amp<sup>R</sup>, ampicillin-resistant; Cm<sup>R</sup>, chloramphenicol-resistant; Kan<sup>R</sup>, kanamycin-resistance; Rif<sup>R</sup>, rifampicin-resistant; Tet<sup>R</sup>, tetracycline-resistant; Tp<sup>R</sup>, trimethoprim-resistant

**Table S3.** Oligonucleotides used in this study.

| Oligonucleotide             | Sequence                                                            | Reference  |
|-----------------------------|---------------------------------------------------------------------|------------|
| Kan-1 (CH106)               | 5' - TGT GTA GGC TGG AGC TGC TTC                                    | 10         |
| Kan-2 (CH107)               | 5' - CAT ATG AAT ATC CTC CTT AGT TCC                                | 10         |
| galM-Bam-for (CH3789)       | 5' - CGC <u>GGA TCC</u> CGG AAG AGC TGG                             | This study |
| galM-Sac-rev (CH3790)       | 5' - TCT <u>GAG CTC</u> AGG GCA AAC AGC ACC                         | This study |
| galT-Kpn-for (CH3787)       | 5' - CAC <u>GGT ACC</u> ATT TGG GCA AAT AGC TTC C                   | This study |
| yfp-Eco-rev (CH3788)        | 5' - CT <u>GAA TTC</u> GCG GCC GCT TCT AGA                          | This study |
| YPK0575-Kpn-for (CH2447)    | 5' - TTT <u>GGT ACC</u> ATG GTA GAG AAT AAT TAT CTA AAC TCC         | This study |
| YPK0576-Xho-rev (CH2448)    | 5' - TTC <u>CTC GAG</u> ACC TTT ACA GCG ACT CAA TGC CAG             | This study |
| YPK0576-Kpn-for (CH2449)    | 5' - TGA <u>GGT ACC</u> ATG AAC GAT ATA GTA AAA AG                  | This study |
| YPK0576-Xho-rev2 (CH2790)   | 5' - TTT <u>CTC GAG</u> TTA ACC TTT ACA GCG                         | This study |
| Nlact-cdil-Spe-rev (CH2345) | 5' - AAA <u>ACT AGT</u> CTT ACA ATA ACT TAG                         | This study |
| Ykris-cdil-Spe-rev (CH2346) | 5' - AAA <u>ACT AGT</u> GCC TTT ACA GCG GC                          | This study |
| Trc-seq2 (CH823)            | 5' - GTT CTG GCA AAT ATT CTG AAA TGA GC                             | This study |
| ara seq (CH943)             | 5' - GAT TAG CGG ATC CTA CCT GAC GCT TTT TAT CGC                    | This study |
| $\beta$ -deletion-for1      | 5' - GCC <u>CAA TGG</u> GCA CAA ACC AGT CTC TGA CCT TCG AT          | This study |
| $\beta$ -deletion-rev1      | 5' - GCG <u>GAT CCG</u> CTT TTA AAC TTA GCC GCA GCA TCG ATG         | This study |
| $\beta$ -deletion-for2      | 5' - GCG <u>GAT CCG</u> GCA CTT CAT CAA TGA TCT CTA ACA GGG         | This study |
| $\beta$ -deletion-rev2      | 5' - GCC <u>TCG AGA</u> CTA GTA CCT TTG CAG CGA CTC AAG             | This study |
| EC869-CT-Nco                | 5' - ATT <u>CCA TGG</u> GCA CAA ACC AGT CTC TGA CCT TCG             | 4          |
| EC869-cdil-Spe              | 5' - TCT <u>ACT AGT</u> ACC TTT GCA GCG ACT CAA GGC CAG             | 4          |
| EC869-Nlact(beta)-for       | 5' - AAA ACT TAC TCT CTT TCT GGT GTT GAG TTA ACT TCA TCA ATG ATC TC | This study |

|                                       |                                                                        |            |
|---------------------------------------|------------------------------------------------------------------------|------------|
| (CH2341)                              |                                                                        |            |
| EC869-<br>Nlact(beta)-rev<br>(CH2342) | 5' - CTC AAC ACC AGA AAG AGA GTA AGT TTT AAA CTT<br>AGC CGC AGC ATC G  | This study |
| EC869-<br>Ykris(beta)-for<br>(CH2343) | 5' - CAT ACA CAT ACT CTT TCA GGC GAA CAG TTA ACT<br>TCA TCA ATG ATC TC | This study |
| EC869-<br>Ykris(beta)-rev<br>(CH2344) | 5' - CTG TTC GCC TGA AAG AGT ATG TGT ATG AAA CTT<br>AGC CGC AGC ATC G  | This study |
| DL1527 (CDI204)                       | 5' - GAA CAT CCT GGC ATG AGC G                                         | 4          |
| EC869o11-G173-<br>rev (CH3640)        | 5' - CCC AAC ATA ATC CTC CCA CGG CAT ACC                               | This study |
| EC869o11-G173-<br>for (CH3641)        | 5' - GGT ATG CCG TGG GAG GAT TAT GTT GGG                               | This study |
| EC93-YPIII-chim-<br>rev (CH2689)      | 5' - GGT CTG GTG TCT AAC CTT TGG GTT AAC CTT TAC<br>AGC GAC TCA ATG C  | This study |
| EC93-YPIII-down-<br>for (CH2690)      | 5' - GCA TTG AGT CGC TGT AAA GGT TAA CCC AAA GGT<br>TAG ACA CCA GAC C  | This study |
| DL2368 (CDI205)                       | 5' - GTT GGT AGT GGT GGT GCT G                                         | 4          |

## References

1. Beckwith, J. R. & Signer, E. R. (1966). Transposition of the *lac* region of *Escherichia coli*. I. Inversion of the *lac* operon and transduction of *lac* by  $\phi 80$ . *J Mol Biol* **19**, 254-65.
2. Thomason, L., Court, D. L., Bubunencko, M., Costantino, N., Wilson, H., Datta, S. & Oppenheim, A. (2007). Recombineering: genetic engineering in bacteria using homologous recombination. *Curr Protoc Mol Biol* **Chapter 1**, Unit 1 16.
3. Garza-Sanchez, F., Janssen, B. D. & Hayes, C. S. (2006). Prolyl-tRNA(Pro) in the A-site of SecM-arrested ribosomes inhibits the recruitment of transfer-messenger RNA. *J Biol Chem* **281**, 34258-68.
4. Morse, R. P., Nikolakakis, K. C., Willett, J. L., Gerrick, E., Low, D. A., Hayes, C. S. & Goulding, C. W. (2012). Structural basis of toxicity and immunity in contact-dependent growth inhibition (CDI) systems. *Proc Natl Acad Sci U S A* **109**, 21480-5.
5. Koskiniemi, S., Garza-Sanchez, F., Sandegren, L., Webb, J. S., Braaten, B. A., Poole, S. J., Andersson, D. I., Hayes, C. S. & Low, D. A. (2014). Selection of orphan Rhs toxin expression in evolved *Salmonella enterica* serovar Typhimurium. *PLoS Genet* **10**, e1004255.
6. Hayes, C. S. & Sauer, R. T. (2003). Cleavage of the A site mRNA codon during ribosome pausing provides a mechanism for translational quality control. *Mol Cell* **12**, 903-11.
7. Datta, S., Costantino, N. & Court, D. L. (2006). A set of recombineering plasmids for gram-negative bacteria. *Gene* **379**, 109-15.
8. Poole, S. J., Diner, E. J., Aoki, S. K., Braaten, B. A., t'Kint de Roodenbeke, C., Low, D. A. & Hayes, C. S. (2011). Identification of functional toxin/immunity genes linked to contact-dependent growth inhibition (CDI) and rearrangement hotspot (Rhs) systems. *PLoS Genet* **7**, e1002217.
9. Bonnet, J., Subsoontorn, P. & Endy, D. (2012). Rewritable digital data storage in live cells via engineered control of recombination directionality. *Proc Natl Acad Sci U S A* **109**, 8884-9.
10. Hayes, C. S., Bose, B. & Sauer, R. T. (2002). Proline residues at the C terminus of nascent chains induce SsrA tagging during translation termination. *J Biol Chem* **277**, 33825-32.

## Figure legends

**Figure S1. The macrocyclic peptide mimic of the  $\beta$ -hairpin from CdiA-CT<sub>011</sub><sup>EC869</sup>.**

**Figure S2. Comparison of CdiA-CT catalytic sites.** In both panels EC869 and YPIII carbon atoms are depicted in white and grey, respectively, and oxygen and nitrogen atoms are colored red and blue, respectively. **(A)** CdiA-CT<sub>011</sub><sup>EC869</sup> active site contains a Zn<sup>2+</sup> ion, depicted by a purple sphere with water molecules depicted as smaller red spheres, and interacting bonds with Zn<sup>2+</sup> are depicted as black dotted lines. **(B)** CdiA-CT<sup>YPIII</sup> active site has no extra density that would create a zinc coordination sphere. Water molecules are depicted as yellow spheres.

**Figure S3. Alignments of CdiA-CT/CdiI<sub>011</sub><sup>EC869</sup> family members.** **(A)** Alignment of DNase toxin domain homologues. Residues are numbered according to the CdiA-CT<sub>011</sub><sup>EC869</sup> sequence beginning with Val1 of the VENN peptide motif. The alignment was rendered with Jalview at 30% sequence identity with progressively darker shades of purple indicating greater residue conservation. Secondary structure elements correspond to CdiA-CT<sub>011</sub><sup>EC869</sup>, CdiA-CT<sub>011</sub><sup>EC869</sup> and CdiA-CT<sup>YPIII</sup> residues that form H-bonds/ion-pairs with cognate immunity proteins are shown in orange, and residues that form hydrophobic/van der Waals contacts are shown in blue. **(B)** Alignment of immunity protein homologues. Residue numbers and secondary structure elements correspond to CdiI<sub>011</sub><sup>EC869</sup>. Residues that interact with toxins are color coded according to the scheme described for panel **A**.

**Figure S4. Electrostatic surfaces of CdiA-CT/CdiI<sub>011</sub><sup>EC869</sup> and CdiA-CT/CdiI<sup>YPIII</sup> complexes.**

Electrostatic surface representation of CdiI<sub>011</sub><sup>EC869</sup> **(A)** and CdiI<sup>YPIII</sup> **(B)**. Red and blue surfaces correspond to positive and negative surface potentials (respectively) and white indicates hydrophobic surfaces. Toxin  $\beta$ -hairpins are shown in stick representation in the left panels. Right panels are rotated 180° around the y-axis with respect to the left panels and the immunity proteins are shown in cartoon representation.

**Figure S5. Target cells become filamentous after inhibition by the  $\text{CDI}_{011}^{\text{EC869}}$  and  $\text{CDI}^{\text{YKris}}$  systems.** Co-culture competitions were performed using mock inhibitors or inhibitor cells deploying the  $\text{CDI}_{011}^{\text{EC869}}$  and  $\text{CDI}^{\text{YPiII}}$  systems and target cells carrying an empty vector (none) or a plasmid expressing  $\text{CdiI}_{011}^{\text{EC869}}$  or  $\text{CdiI}^{\text{YPiII}}$ . Cell length values were measured from microscopy images taken of each competition. Each object plotted represents the length of a single cell. Black bars indicate the mean of each data set. *P* values from two-tailed unpaired t-tests are reported. \*\*\*, *P* < 0.0001.

**Figure S6. Superimposition of immunity protein homologues.** The  $\text{CdiI}^{\text{YPiII}}$ ,  $\text{CdiI}_{011}^{\text{EC869}}$ ,  $\text{CdiI}^{\text{YKris}}$  and  $\text{CdiI}^{\text{Nmen}}$  immunity proteins are depicted in cartoon representations colored in magenta, cyan, gold and gray, respectively. The structures of  $\text{CdiI}^{\text{Nmen}}$  (PDB ID: 2GKP) and  $\text{CdiI}^{\text{YKris}}$  were determined in the absence of bound toxin. The location of the  $\beta$ -hairpin binding pocket is indicated and the extended loop (E-L) connecting  $\alpha 1^*$  to  $\alpha 2^*$  of  $\text{CdiI}^{\text{YPiII}}$  is labeled.

**Figure S7. Electrostatic surface potential of toxin  $\beta$ -hairpin chimeras.** (A) Electrostatic surface representation of  $\text{CdiI}_{011}^{\text{EC869}}$  with the toxin  $\beta$ -hairpin in cartoon and sticks colored green (left panel). The right panel is rotated 180° around the y-axis with respect to the left panel. The immunity protein is depicted as cartoon representation and the toxin  $\beta$ -hairpin is rendered as an electrostatic surface representation. (B) and (C) Models of  $\text{CdiA-CT}^{\text{Nlact}}$  and  $\text{CdiA-CT}^{\text{YKris}}$   $\beta$ -hairpins docked onto  $\text{CdiI}_{011}^{\text{EC869}}$  immunity protein. The models are viewed in the same orientation as the right image in panel A. The  $\beta$ -hairpins are rendered as electrostatic surface representations, with red and blue representing positive and negative surface potentials (respectively) and white indicating hydrophobic surfaces.



Figure S1

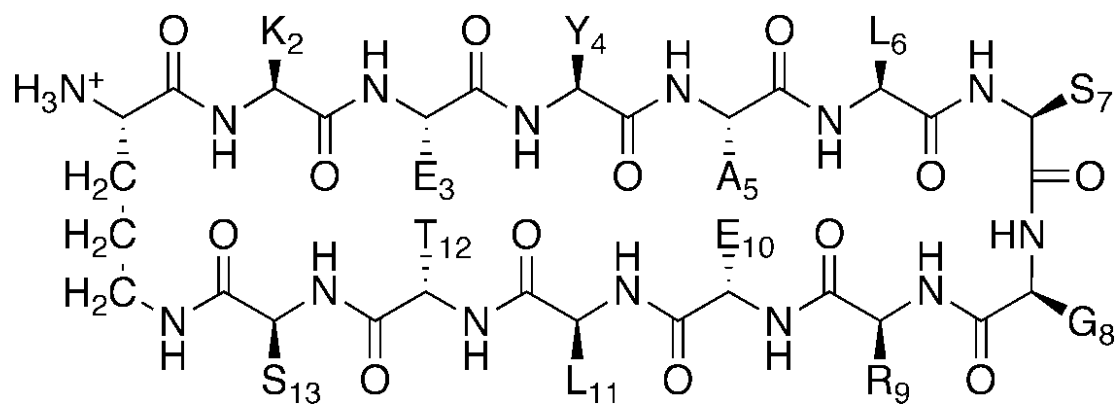

Figure S2

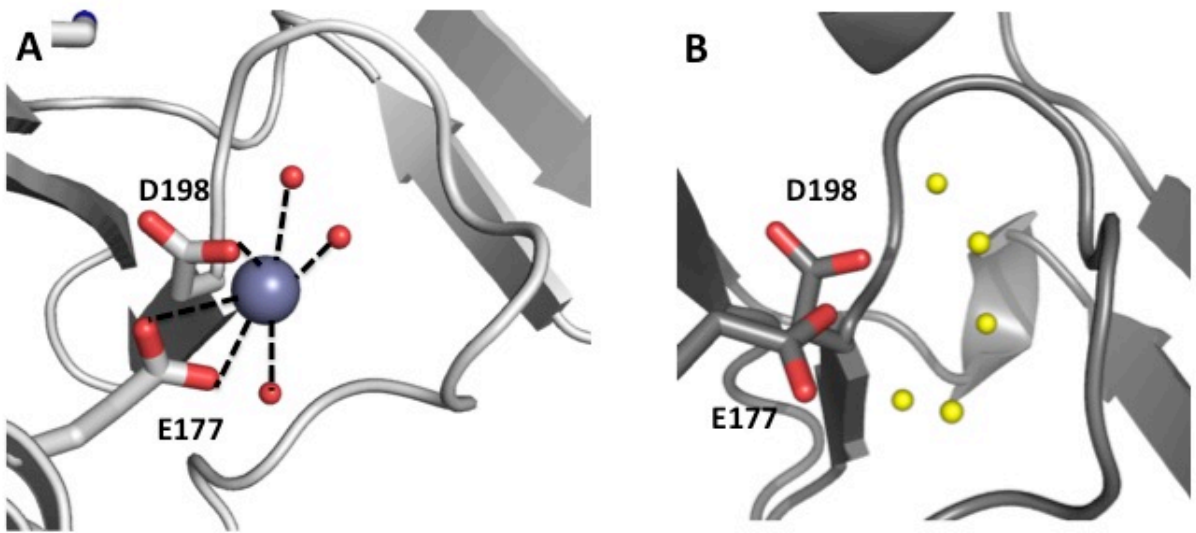

Figure S3

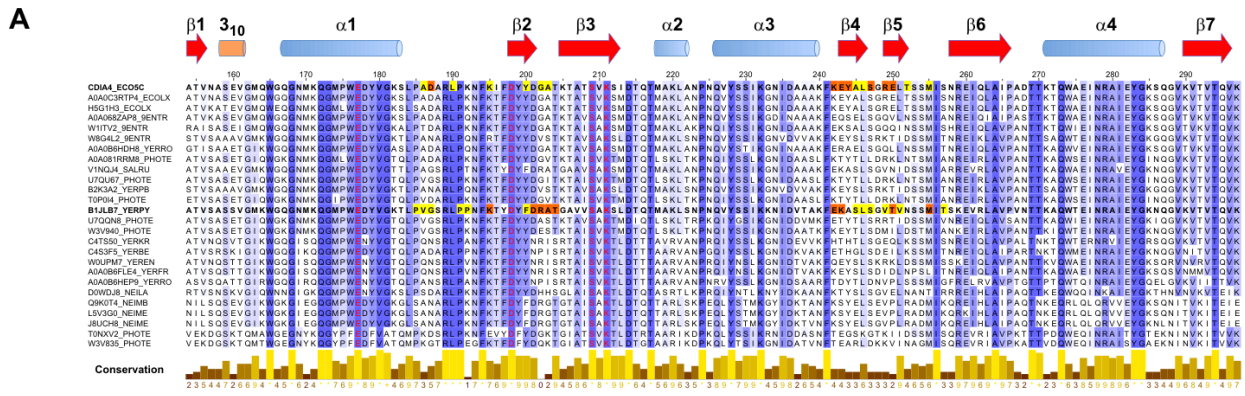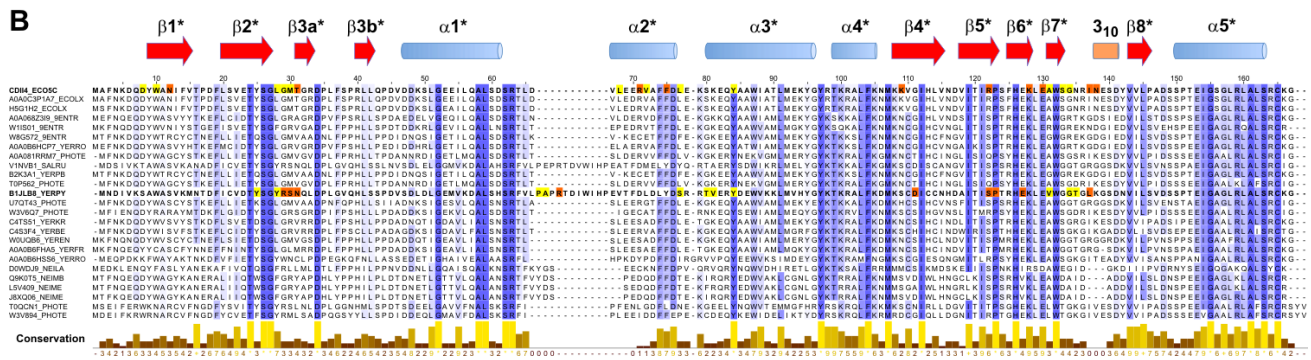

Figure S4

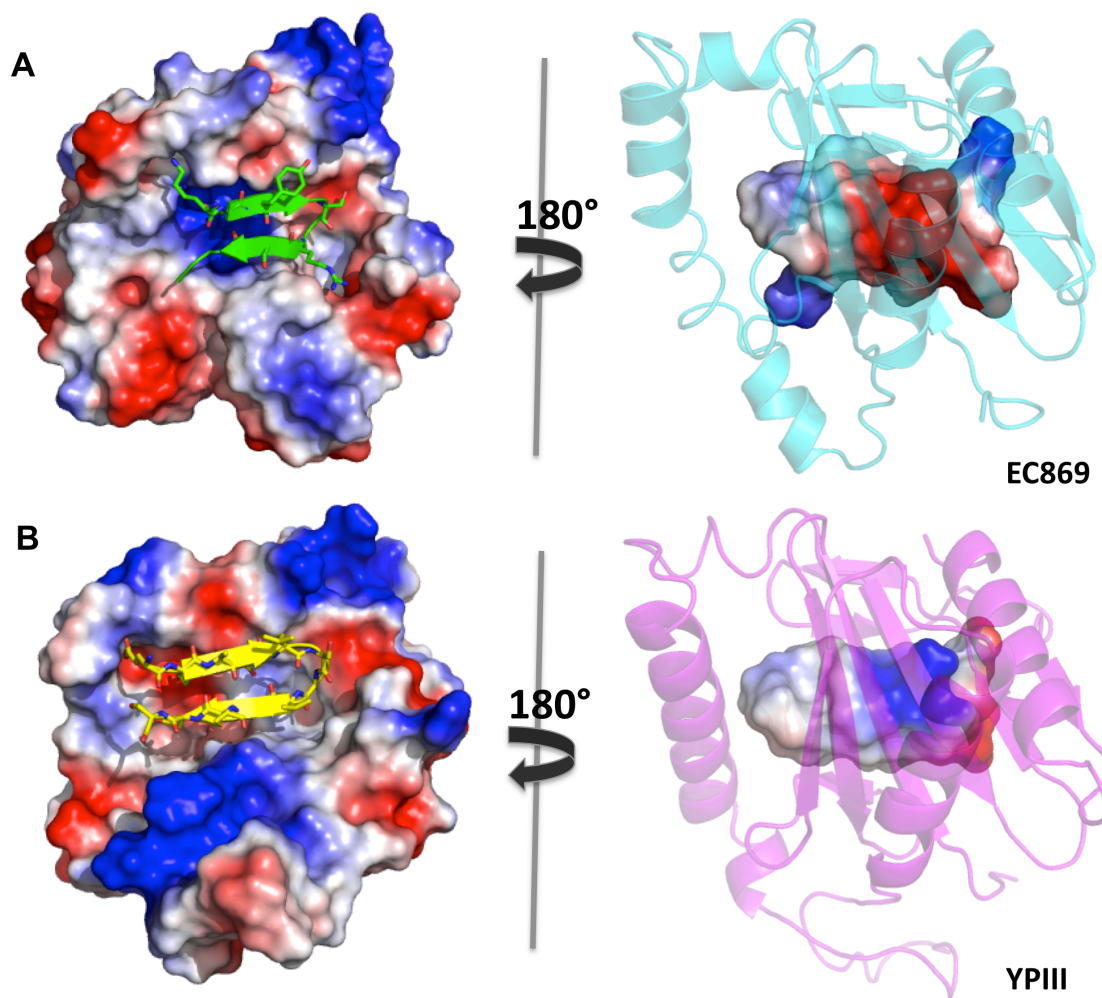

Figure S5

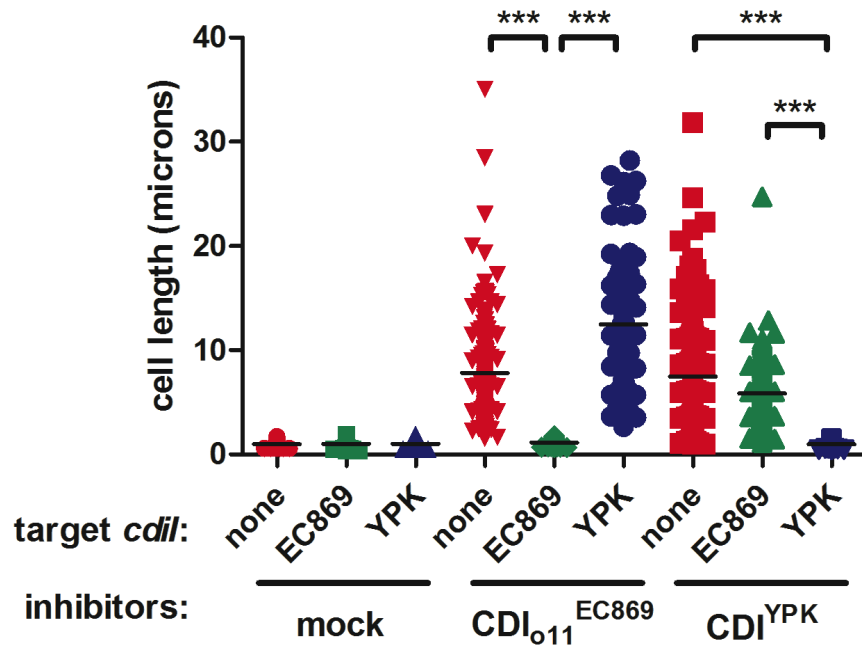

Figure S6

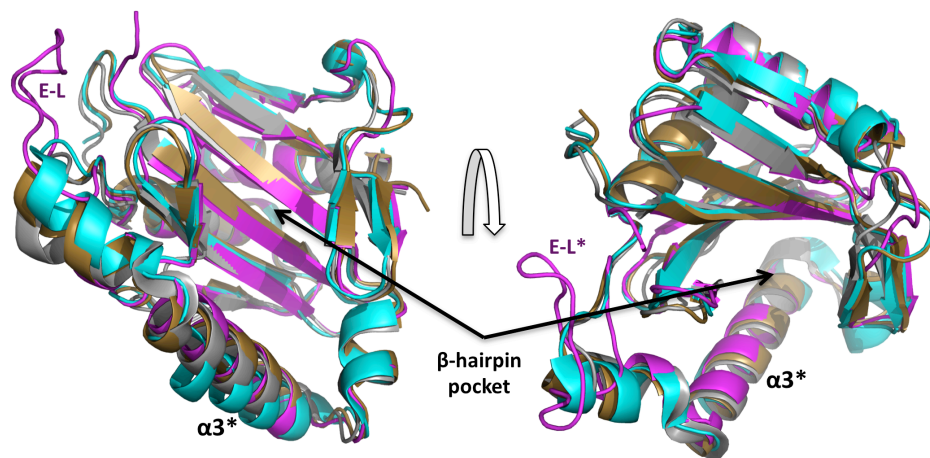

Figure S7

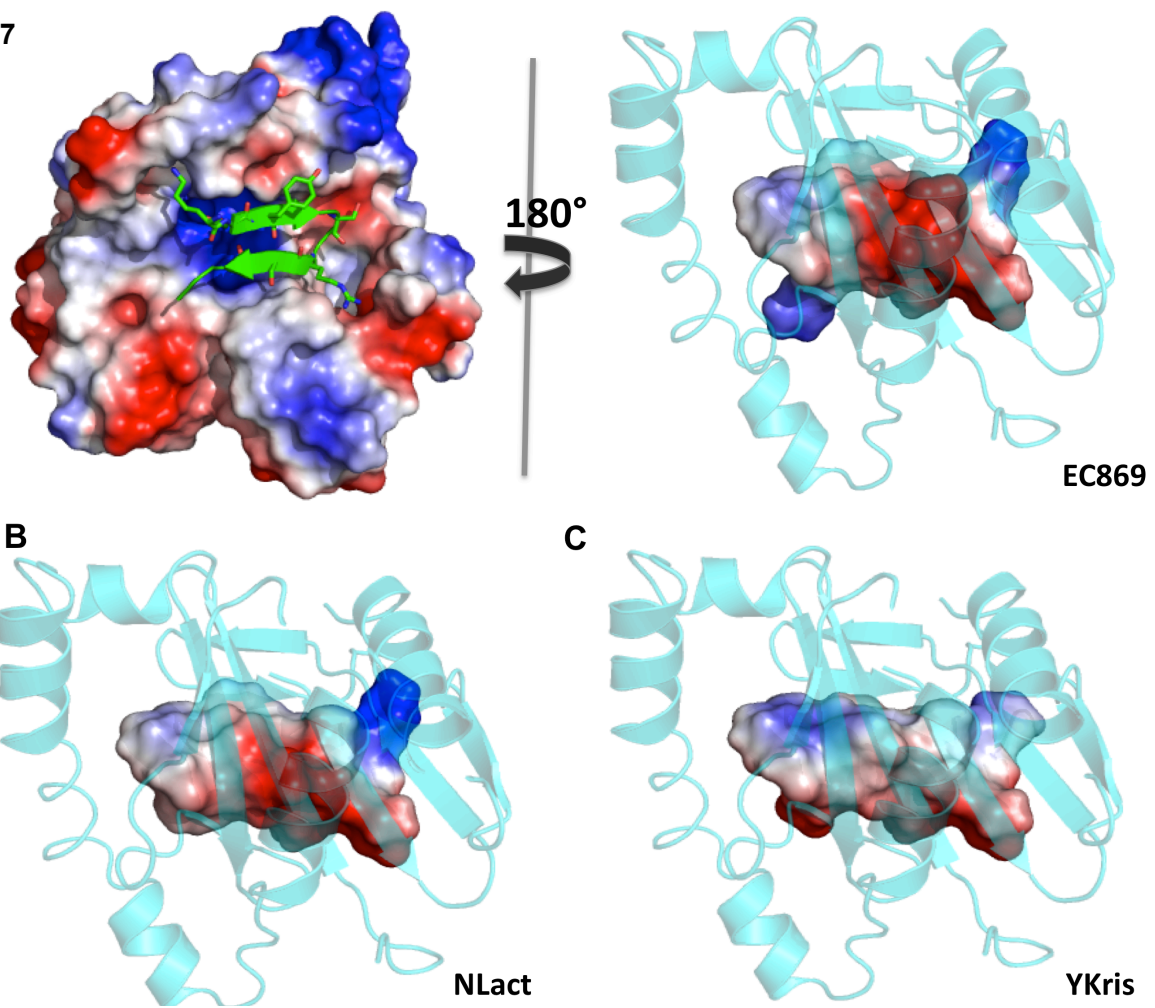

Supplement: NIHMS729123-supplement-4.pdf [file NIHMS729123-supplement-4.pdf]
